## Primer

# The Evolutionary and Developmental Foundations of Mathematics

Michael J. Beran

Understanding the evolutionary precursors of human mathematical ability is a highly active area of research in psychology and biology with a rich and interesting history. At one time, numerical abilities, like language, tool use, and culture, were thought to be uniquely human. However, at the turn of the 20th century, scientists showed more interest in the numerical abilities of animals. The earliest research was focused on whether animals could count in any way that approximated the counting skills of humans [1,2], though many early studies lacked the necessary scientific controls to truly prove numerical abilities in animals. In addition, both the public and many in the scientific community too readily accepted cases of “genius” animals, including those that performed amazing mathematical feats. One such animal still lends its name to the phenomenon of inadvertent cuing of animals by humans: Clever Hans. Hans was a horse that seemed to calculate solutions to all types of numerical problems. In reality, the horse was highly attuned to the subtle and inadvertent bodily movements that people would make when Hans had reached the correct answer (by tapping his hoof) and should have stopped responding [3]. One consequence of this embarrassing realization was a backlash for the better part of the 20th century against the idea that animals could grasp numerical concepts. The second, more positive consequence, however, was that future researchers would include appropriate controls to account for such cues.

A resurgence of interest in animal numerical abilities in the early 1980s followed closely on the heels of a landmark book on children’s number learning that outlined the critical principles that children must master to become proficient in counting [4]. This resurgence also was the result of a general increase in studies of animal cognition and intelligence. New research programs provided compelling evidence that animals are sensitive to the numerical properties of various kinds of things, even if they do not quite reach the level of human counting abilities. For instance, multiple research teams showed that chimpanzees could learn the meanings of Arabic numerals when taught to collect sets of items to match the values of numerals [5,6], to label sets of items with the correct numeral [7,8], and even to add the values of those numerals [9]. Animal numerical competence had reclaimed the spotlight, and it remains a highly visible area of animal cognition research. Today, we know just how important quantity and number concepts are for a great variety of animals such as salamanders [10], rats [11], various types of birds [12–14], dolphins [15], monkeys [16,17], and apes [18,19].

What consistently emerges from these kinds of studies is that animals are mathematically inclined, but only to a certain degree. Their performance usually is constrained by an objective measure of task difficulty that relates to well-known psychophysical phenomena. Namely, animals seem to use approximate representations of number. For example, in comparison tasks, performance can nearly always be predicted very well by knowing the relation of the two sets to each other. As the difference (or quantitative distance) between sets becomes smaller, the task of choosing the correct set becomes harder (for example, comparing 4 to 6 is easier than comparing 4 to 5). When the difference between sets is held constant, then the task becomes harder as both sets increase in their overall magnitude (for example, comparing 4 to 6 is easier than comparing 6 to 8). What is interesting is that when adult humans are prevented from counting, they also show similar evidence that they have access to a system of noisy magnitudes that they use as a form of nonverbal representation [20,21], and even societies without language-based numerical systems show evidence of nonverbal number approximation [22,23]. In fact, when directly compared, monkeys often show highly similar patterns of performance to young human children [24] and human adults [25–27]. The latest example of such similarities in performance comes from a paper in *PLoS Biology* by Cantlon and Brannon [28]. Researchers tested humans and monkeys in a task where two sets of dots were shown in succession on a computer screen, and participants had to add the sets and then find a match option that had the same total number of dots. Humans did better than monkeys, but the important finding was that both species were constrained in their performance based on how closely the two options resembled each other. The researchers concluded that monkeys and humans share components of a mathematical tool kit that can be applied to various types of problems. The novel aspect of this research is that it shows that monkeys, like humans, can add sets together and remember the total number of items. Most likely, monkeys are not the only animals to share these abilities with humans.

Given these behavioral similarities, one wonders whether monkeys and humans might not only perform these tasks

**Citation:** Beran MJ (2008) The evolutionary and developmental foundations of mathematics. *PLoS Biol* 6(2): e19. doi:10.1371/journal.pbio.0060019

**Copyright:** © 2008 Michael J. Beran. This is an open-access article distributed under the terms of the Creative Commons Attribution License, which permits unrestricted use, distribution, and reproduction in any medium, provided the original author and source are credited.

**Abbreviations:** IPS, intraparietal sulcus; PFC, prefrontal cortex; VIP, ventral intraparietal region

Michael J. Beran is with the Language Research Center at Georgia State University, Atlanta, Georgia, United States of America. E-mail: mjberan@yahoo.com

Primers provide a concise introduction into an important aspect of biology highlighted by a current *PLoS Biology* research article.

at similar levels, but also in truly similar ways. Hypothetical models for numerical representation can account for the distance and magnitude effects described above [29–31], and environmental pressures seem to place a premium on an approximate “number sense” [32] for nonhuman animals as well as humans. Research with neuropsychological patients and from functional neuroimaging studies indicates that two brain areas, the intraparietal sulcus (IPS) and the prefrontal cortex (PFC), seem intricately linked to number skills in humans (for overviews, see [32,33]). We now know that animal brains also are attuned to numerical properties. There is evidence that there are distinct neural populations and processing stages within the IPS for different quantity presentation types (e.g., sequential versus simultaneous) in monkeys, although abstract representations that occur later in processing may subsume these distinct stages [34]. Single neurons in the ventral intraparietal region (VIP) and PFC in the macaque brain have been found to be attuned to specific numerical values [35,36]. Thus, a neuron in VIP responds maximally to one value, and the firing rate decreases with distance from this preferred value. However, a recent paper by Roitman, Brannon, and Platt published in *PLoS Biology* shows that another region in the parietal cortex, the lateral intraparietal region, encodes numbers differently than the VIP [37]. These neurons increase or decrease in activity based on the number of elements in a visual array, suggesting that they serve to represent accumulated magnitude, an important part of the formal counting routine that provides cardinal (exact) values of numerosity. They may even provide the magnitude information necessary for other brain regions to discern cardinal numerical representations as the brain moves from summing and estimating magnitude to representing exact numerical information. Thus, these data are exciting because they provide a link between theoretical models of number processing and actual brain/behavior relations.

Human mathematical abilities, of course, are highly dependent on symbolic representations of number. A recent paper by Diester and Nieder published in *PLoS Biology* shows that brain areas critical to processing symbolic and analogue numerosities in humans also support numerical processing in monkeys [38]. After monkeys learned to associate Arabic numerals with specific numbers of items, the researchers recorded from single neurons in the PFC and IPS when monkeys judged whether two successive analog arrays were the same in number or whether an analog array matched a numeral in a pairing. PFC neurons were selectively responsive to given numerical values, presented in either analog or symbolic formats. In other words, the PFC in monkeys seems to be involved in the association between symbols and numerical concepts, and it builds upon the capacities of the IPS to encode approximate numerical information early in quantity processing. By four years of age, the IPS in human children is already responsive to changes in the numerosity of visual arrays [39], but the parietal cortex shows a more protracted developmental trajectory for the representation of symbolic numbers. Specifically, children who have not yet become proficient with numerals show elevated PFC activity in response to numerals, whereas parietal areas seemingly take over as proficiency with symbols emerges [40,41]. In adult humans, representation of numerical information across many formats (numerals, analog stimuli, number words) relies substantially on parietal areas [42].

A new report in *PLoS Biology* by Izard, Dehaene-Lambertz, and Dehaene [43] using event-related potentials also supports the idea that humans are born with a dedicated system for numerical processing. Three-month-old children watched as a stream of images consisting of discrete numbers of items was presented. Usually, the number and type of items stayed consistent across images, but the critical data came from trials in which the number of items changed or the type of items changed while the number stayed the same. Different parts of the brain responded to these types of changes, with the prefronto-parietal pathway again responsive to changes in numerosity. This, too, supports the idea that human brains are attuned early in development to number as a highly relevant dimension of the external world.

The Izard et al. paper also is important for what it did not show: differential cerebral responses to small versus large numbers of items. A recent debate within the numerical cognition literature pertains to whether different mechanisms support the representation of small sets and large sets by animals and young children. This *two core number systems hypothesis* [44] draws some support from studies both with monkeys [45] and young children [46,47], although other studies show no such distinction in the processing of small sets and large sets [25,27,48,49]. The data from Izard et al. support the idea that human infants and nonhuman primates share the ability for analog representation across a wide range of numerosities through use of a singular mechanism rather than two distinct mechanisms.

These recent studies have expanded our understanding of the evolution of numerical cognition. Brains (both human and nonhuman) have evolved to deal with numerosity, with different regions supporting different mechanisms of numerical representation. These phylogenetically widespread capacities seem perfectly suited to support survival. Any creature that can tell the difference between a tree with 10 pieces of fruit from another with only six pieces, or between two predators and three on the horizon, has a better chance of surviving and reproducing. At the same time, telling the difference between 24 and 28 pieces of fruit (or nine predators versus 10) does not offer much advantage. What happens next in human development is that we learn to map symbols onto these representations, and then we learn to manipulate those symbols in ways that eventually support our advanced mathematical competencies. We also know that cultural differences, including learning strategies and the way in which reading is performed, can have impacts on how the brain processes some types of numerical information [50], indicating a relation between early experience and numerical processing. Although no one expects that a pigeon or chimpanzee would ever learn trigonometry or calculus, it remains to be seen what greater capacities might one day be exhibited by nonhuman animals. Human children are raised in environments in which numerical information is everywhere, and number words and number symbols are used frequently. One future step should be to provide animals with the type of environment that supports the emergence of more complicated mathematical skills. Longitudinal studies with animals exposed to logically structured, highly enriching environments that focus on numerical development are needed, as are additional cross-cultural studies with humans. Coupled with the emerging capacities for tracking brain activity and the creative methodologies for understanding

numerical skills that are outlined above, we should have every expectation of continuing to improve our understanding of the evolutionary and developmental foundations of mathematics. ■

## References

- Kinnaman AJ (1902) Mental life of two *Macacus rhesus* monkeys in captivity. *Am J Psychol* 13: 173–218.
- Keohler O (1951) The ability of birds to count. *Bull Anim Behav* 9: 41–45.
- Pfungst O (1965) *Clever Hans, the horse of Mr. Von Osten*. New York: Holt, Rinehart and Winston.
- Gelman R, Gallistel CR (1978) *The child's understanding of number*. Cambridge (MA): Harvard University Press.
- Rumbaugh DM, Hopkins WD, Washburn DA, Savage-Rumbaugh ES (1989) Lana chimpanzee learns to count by "NUMATH": A summary of a videotaped experimental report. *Psychol Rec* 39: 459–470.
- Beran MJ, Rumbaugh DM (2001) "Constructive" enumeration by chimpanzees (*Pan troglodytes*) on a computerized task. *Anim Cogn* 4: 81–89.
- Matsuzawa T (1985) Use of numbers by a chimpanzee. *Nature* 315: 57–59.
- Tomonaga M, Matsuzawa T (2002) Enumeration of briefly presented items by the chimpanzee (*Pan troglodytes*) and humans (*Homo sapiens*). *Anim Learn Behav* 30: 143–157.
- Boysen ST, Berntson GG (1989) Numerical competence in a chimpanzee (*Pan troglodytes*). *J Comp Psychol* 103: 23–31.
- Uller C, Jaeger R, Guidry G, Martin C (2003) Salamanders (*Plethodon cinereus*) go for more: Rudiments of number in an amphibian. *Anim Cogn* 6: 105–112.
- Capaldi EJ, Miller DJ (1988) Counting in rats: Its functional significance and the independent cognitive processes that constitute it. *J Exp Psychol Anim Behav Proc* 14: 3–17.
- Pepperberg IM (1994) Numerical competence in an African Grey parrot (*Psittacus erithacus*). *J Comp Psychol* 108: 36–44.
- Roberts WA, Coughlin R, Roberts S (2000) Pigeons flexibly time or count on cue. *Psychol Sci* 11: 218–222.
- Emmerton J (1998) Numerosity differences and effects of stimulus density on pigeons' discrimination performance. *Anim Learn Behav* 26: 243–256.
- Jaakkola K, Fellner W, Erb L, Rodriguez M, Guarino E (2005) Understanding of the concept of numerically "less" by bottlenose dolphins (*Tursiops truncatus*). *J Comp Psychol* 119: 286–303.
- Brannon EM, Terrace HS (2000) Representation of the numerosities 1–9 by rhesus macaques (*Macaca mulatta*). *J Exp Psychol Anim Behav Proc* 26: 31–49.
- Washburn DA, Rumbaugh DM (1991) Ordinal judgments of numerical symbols by macaques (*Macaca mulatta*). *Psychol Sci* 2: 190–193.
- Beran MJ, Beran MM (2004) Chimpanzees remember the results of one-by-one addition of food items to sets over extended time periods. *Psychol Sci* 15: 94–99.
- Hanus D, Call J (2007) Discrete quantity judgments in the great apes (*Pan paniscus*, *Pan troglodytes*, *Gorilla gorilla*, *Pongo pygmaeus*): The effect of presenting whole sets versus item-by-item. *J Exp Psychol Anim Behav Proc* 121: 241–249.
- Cordes S, Gelman R, Gallistel CR, Whalen J (2001) Variability signatures distinguish verbal from nonverbal counting for both large and small numbers. *Psychon Bull Rev* 8: 698–707.
- Whalen J, Gallistel CR, Gelman R (1999) Nonverbal counting in humans: The psychophysics of number representation. *Psychol Sci* 10: 130–137.
- Pica P, Lemer C, Izard V, Dehaene S (2004) Exact and approximate arithmetic in an Amazonian indigene group. *Science* 306: 499–503.
- Gordon P (2004) Numerical cognition without words: Evidence from Amazonia. *Science* 306: 496–499.
- Jordan KE, Brannon EM (2006) A common representational system governed by Weber's law: Nonverbal numerical similarity judgments in 6-year-olds and rhesus macaques. *J Exp Child Psychol* 95: 215–229.
- Beran MJ (2007) Rhesus monkeys (*Macaca mulatta*) enumerate sequentially presented sets of items using analog numerical representations. *J Exp Psychol Anim Behav Proc* 33: 42–54.
- Beran MJ, Taglialatela LA, Flemming TJ, James FM, Washburn DA (2006) Nonverbal estimation during numerosity judgements by adult humans. *Q J Exp Psychol* 59: 2065–2082.
- Cantlon JF, Brannon EM (2006) Shared system for ordering small and large numbers in monkeys and humans. *Psychol Sci* 17: 401–406.
- Cantlon JF, Brannon EM (2007) Basic math in monkeys and college students. *PLoS Biol* 5(12): e328. doi:10.1371/journal.pbio.0050328.
- Meck WH, Church RM (1983) A mode control model of counting and timing processes. *J Exp Psychol Anim Behav Proc* 9: 320–334.
- Dehaene S, Changeux J-P (1993) Development of elementary numerical abilities: A neuronal model. *J Cogn Neuro* 5: 390–407.
- Verguts T, Fias W (2004) Representation of number in animals and humans: A neural model. *J Cogn Neuro* 16: 1493–1504.
- Dehaene S (1997) *The number sense: How the mind creates mathematics*. New York: Oxford University Press.
- Butterworth B (1999) *The mathematical brain*. London: Macmillan.
- Nieder A, Diester I, Tudusciuc O (2006) Temporal and spatial enumeration processes in the primate parietal cortex. *Science* 313: 1431–1435.
- Nieder A, Miller EK (2003) Coding of cognitive magnitude: Compressed scaling of numerical information in the primate prefrontal cortex. *Neuron* 37: 149–157.
- Nieder A, Miller EK (2004) A parieto-frontal network for visual numerical information in the monkey. *Proc Nat Acad Sci U S A* 101: 7457–7462.
- Roitman JD, Brannon EM, Platt ML (2007) Monotonic coding of numerosity in macaque lateral intraparietal area. *PLoS Biol* 5(11): e208. doi:10.1371/journal.pbio.0050208.
- Diester I, Nieder A (2007) Semantic associations between signs and numerical categories in the prefrontal cortex. *PLoS Biol* 5: e294. doi:10.1371/journal.pbio.0050294.
- Cantlon JF, Brannon EM, Carter EJ, Pelphrey KA (2006) Functional imaging of numerical processing in adults and 4-year-old children. *PLoS Biol* 4: e125. doi:10.1371/journal.pbio.0040125.
- Ansari D, Garcia N, Lucas E, Hamon K, Dhital B (2005) Neural correlates of symbolic number processing in children and adults. *Neuroreport* 16: 1769–1773.
- Rivera SM, Reiss AL, Eckert MA, Menon V (2005) Developmental changes in mental arithmetic: evidence for increased functional specialization in the left inferior parietal cortex. *Cereb Cortex* 15: 1779–1790.
- Piazza M, Pinel P, Le Bihan D, Dehaene S (2007) A magnitude code common to numerosities and number symbols in human intraparietal cortex. *Neuron* 53: 293–305.
- Izard V, Dehaene-Lambertz G, Dehaene D (2008) Distinct cerebral pathways for object identity and number in human infants. *PLoS Biol* 6(2): e11. doi:10.1371/journal.pbio.0060011.
- Feigenson L, Dehaene S, Spelke E (2004) Core systems of number. *Trends Cogn Sci* 8: 307–314.
- Hauser MD, Carey S, Hauser LB (2000) Spontaneous number representation in semi-free-ranging rhesus monkeys. *Proc Roy Soc Lon B* 267: 829–833.
- Hauser MD, Carey S, Hauser MD (2002) The representations underlying infants' choice of more: Object files versus analog magnitudes. *Psychol Sci* 13: 150–156.
- Xu F (2003) Numerosity discrimination in infants: Evidence for two systems of representations. *Cognition* 89: B15–B25.
- Beran MJ (2004) Chimpanzees (*Pan troglodytes*) respond to nonvisible sets after one-by-one addition and removal of items. *J Comp Psychol* 118: 25–36.
- Nieder A, Merten K (2007) A labeled-line code for small and large numerosities in the monkey prefrontal cortex. *J Neurosci* 27: 5986–5993.
- Tang Y, Zhang W, Chen K, Feng S, Ji Y, et al. (2006) Arithmetic processing in the brain shaped by cultures. *Proc Nat Acad Sci U S A* 103: 10775–10780.
